# Supplementary material for: Rapid and precise genome engineering in a naturally short-lived vertebrate
Source: eLife journal article supplement (doi:10.7554/elife.80639), 2023-04-17
Supplement: fig1-figsupp2-data1 [file Figure1-figure supplement 2-Source Data 1.xlsx]

## Sheet: Sheet1
Figure1-figure supplement 2C
												Number of embryos dead														Percent of embryos dead (lethality %)
Exp.	Name	Locus	Insertion	GuideRNA	Donor template type	Donor modification	Enhancer	Rep.	Injected/ collected	Dead upon injection	Survivng after injection	Days post injection 1	Days post injection 2	Days post injection 3	Days post injection 4	Days post injection 5	Days post injection 6	Days post injection 7	Days post injection 8	Days post injection 9	Days post injection10	Days post injection 11	Days post injection 12	Days post injection 13	Final surviving	Days post injection 1	Days post injection 2	Days post injection 3	Days post injection 4	Days post injection 5	Days post injection 6	Days post injection 7	Days post injection 8	Days post injection 9	Days post injection10	Days post injection 11	Days post injection 12	Days post injection 13
1	CRYAA-T2A-Venus	CRYAA	T2A-Venus	CRYAA	IDT Alt-R HDR Donor Block	+	+	3	100	4	96	63	18	1	2	1	1	0	0	1	0	0	0	0	9	65.625	18.75	1.04167	2.08333	1.04167	1.04167	0	0	1.04167	0	0	0	0
1	CRYAA-T2A-Venus	CRYAA	T2A-Venus	CRYAA	IDT Alt-R HDR Donor Block	+	+	4	81	0	81	28	14	8	3	1	0	1	0	0	0	0	1	0	25	34.5679	17.284	9.87654	3.7037	1.23457	0	1.23457	0	0	0	0	1.23457	0
1	Matched WT control	-	-	-	-	-	-	-	51	0	51	27	6	2	1	0	2	2	2	2	3	0	0	0	4	52.9412	11.7647	3.92157	1.96078	0	3.92157	3.92157	3.92157	3.92157	5.88235	0	0	0
2	ELAVL3-T2A-Venus	ELAVL3	T2A-Venus	ELAVL3	IDT gBlock	-	-	3	120	1	119	36	52	6	1	2	1	1	0	3	1	0	1	0	15	30.2521	43.6975	5.04202	0.840336	1.68067	0.840336	0.840336	0	2.52101	0.840336	0	0.840336	0
2	ELAVL3-T2A-Venus	ELAVL3	T2A-Venus	ELAVL3	IDT gBlock	-	-	4	114	6	108	33	33	4	5	0	3	1	1	0	0	0	0	0	28	30.5556	30.5556	3.7037	4.62963	0	2.77778	0.925926	0.925926	0	0	0	0	0
2	Matched WT control	-	-	-	-	-	-	-	41		41	7	12	2	0	4	2	1	0	3	0	2	1	1	6	17.0732	29.2683	4.87805	0	9.7561	4.87805	2.43902	0	7.31707	0	4.87805	2.43902	2.43902
3	ELAVL3-T2A-Venus	ELAVL3	T2A-Venus	ELAVL3	IDT Alt-R HDR Donor Block	+	+	3	82	2	80	27	13	3	0	3	1	3	2	5	0	0	0	0	23	33.75	16.25	3.75	0	3.75	1.25	3.75	2.5	6.25	0	0	0	0
3	ELAVL3-T2A-Venus	ELAVL3	T2A-Venus	ELAVL3	IDT Alt-R HDR Donor Block	+	+	4	121	3	118	54	28	4	4	2	1	0	0	2	1	0	0	0	22	45.7627	23.7288	3.38983	3.38983	1.69492	0.847458	0	0	1.69492	0.847458	0	0	0
3	Matched WT control	-	-	-	-	-	-	-	46	0	46	11	7	0	1	0	0	0	1	0	1	0	0	0	25	23.913	15.2174	0	2.17391	0	0	0	2.17391	0	2.17391	0	0	0
4	ELAVL3-T2A-P2A	ELAVL3	T2A-Venus-P2A-oScar	ELAVL3	IDT Alt-R HDR Donor Block	+	+	3	109	2	107	45	18	13	2	3	0	1	4	1	2	0	0	0	18	42.0561	16.8224	12.1495	1.86916	2.80374	0	0.934579	3.73832	0.934579	1.86916	0	0	0
4	ELAVL3-T2A-P2A	ELAVL3	T2A-Venus-P2A-oScar	ELAVL3	IDT Alt-R HDR Donor Block	+	+	4	54	0	54	25	9	2	1	2	1	2	1	1	1	0	0	0	9	46.2963	16.6667	3.7037	1.85185	3.7037	1.85185	3.7037	1.85185	1.85185	1.85185	0	0	0
4	Matched WT control	-	-	-	-	-	-	-	40	0	40	9	7	4	0	1	0	1	1	0	0	0	0	0	17	22.5	17.5	10	0	2.5	0	2.5	2.5	0	0	0	0	0
