# Supplementary material for: Rapid and precise genome engineering in a naturally short-lived vertebrate
Source: eLife journal article supplement (doi:10.7554/elife.80639), 2023-04-17
Supplement: fig2-figsupp3-data1 [file Figure2-figure supplement 3-Source Data 1.xlsx]

## Sheet: Sheet1
Figure2-figure supplement 3B
	Fold change 2^(-delta delta Ct)
	Target: Venus
	WT	ELAVL3-T2A-Venus (+/+)	ELAVL3-T2A-Venus (+/-)
	1.25	1372.7	747.61
	0.71	1623.94	848.54
	0.82	1545.63	910.49
	1.09	1628.94	729.32
	1.26	2013.24	762.57
Figure2-figure supplement 3C
	Fold change 2^(-delta delta Ct)
	Target ELAVL3
	WT	ELAVL3-T2A-Venus (+/+)	ELAVL3-T2A-Venus (+/-)
	1.25	0.67	1.04
	0.69	0.78	1.12
	1.01	0.76	1.23
	0.99	0.84	0.9
	1.16	0.96	1.23
