# Supplementary material for: Rapid and precise genome engineering in a naturally short-lived vertebrate
Source: eLife journal article supplement (doi:10.7554/elife.80639), 2023-04-17
Supplement: fig4-figsupp1-data2 [file Figure4-figure supplement 1-Source Data2.pdf › Figure4-figure supplement 1-Source Data2.pdf]

F1  
NPY-T2A-Venus

F1  
NPY-T2A-Venus

WT

▶ L1f/L1r (1 kb)  
▶ Vf/L1r (0.5 kb)  
▶ L1f/L1r (0.3 kb)

F1  
HCRT-T2A-Venus WT

▶ Vf/L1r (0.4 kb)  
▶ L1f/L1r (0.3 kb)
