# Supplementary material for: Rapid and precise genome engineering in a naturally short-lived vertebrate
Source: eLife. 2023 May 16;12:e80639. doi: 10.7554/eLife.80639 (PMC10188113; doi:10.7554/eLife.80639)
Supplement: Figure 4—figure supplement 3—source data 1. [file elife-80639-fig4-figsupp3-data1.xlsx]

## Sheet: Sheet1
Figure4-figure supplement 3B
	Fold change 2^(-delta delta Ct)
	Target: Venus
	WT	NPY-T2A-Venus (+/+)	NPY-T2A-Venus (+/-)
	1.21	108.01	57.73
	1.03	120.73	62.5
	1.08	167.06	71.89
	0.75	146.57	64.71
		197.54	75.51
			59.82
Figure4-figure supplement 3C
	Fold change 2^(-delta delta Ct)
	Target NPY
	WT	NPY-T2A-Venus (+/+)	NPY-T2A-Venus (+/-)
	0.74	0.47	0.73
	0.96	0.53	0.81
	1.27	0.73	0.98
	1.15	0.68	0.84
	1.15	0.82	0.85
	0.83		0.79
