# Supplementary material for: Rapid and precise genome engineering in a naturally short-lived vertebrate
Source: eLife. 2023 May 16;12:e80639. doi: 10.7554/eLife.80639 (PMC10188113; doi:10.7554/eLife.80639)
Supplement: Supplementary file 4. [file elife-80639-supp4.xlsx]

## Sheet: Fig1C_Fig3B_Fig1--figsup2AB
Name	Locus	Insertion	Donor template type	Donor modification	HDR Enhancer	Rep.	Injected	Dead	Diapause or arrested development	Developed & Venus +	Developed & Venus -	Total Developed	Fraction developed Venus +	Lethality
ELAVL3-T2A-Venus	ELAVL3	T2A-Venus	IDT gBlock	-	-	1	249	208	9	5	27	32	0.15625	0.835341
						2	79	72	4	1	2	3	0.333333	0.911392
						3	79	33	4	12	30	42	0.285714	0.417722
						4	119	107	3	3	6	9	0.333333	0.89916
						5	108	87	6	3	12	15	0.2	0.805556
ELAVL3-T2A-Venus	ELAVL3	T2A-Venus	IDT HDR Donor Block V1 modification (not commercially available)	+ (V1)	-	1	51	35	6	3	7	10	0.3	0.686275
						2	55	23	14	5	13	18	0.277778	0.418182
						3	96	65	5	12	14	26	0.461538	0.677083
						4	74	50	2	6	16	22	0.272727	0.675676
ELAVL3-T2A-Venus	ELAVL3	T2A-Venus	IDT HDR Donor Block V1 modification (not commercially available)	+ (V1)	+	1	159	93	33	14	19	33	0.424242	0.584906
						2	95	58	8	8	21	29	0.275862	0.610526
						3	95	51	1	11	32	43	0.255814	0.536842
						4	77	65	3	6	3	9	0.666667	0.844156
						5	110	88	10	4	8	12	0.333333	0.8
ELAVL3-T2A-Venus	ELAVL3	T2A-Venus	IDT gBlock	-	+	1	146	88	31	5	22	27	0.185185	0.60274
						2	78	65	3	3	7	10	0.3	0.833333
						3	50	44	0	3	3	6	0.5	0.88
ELAVL3-T2A-Venus	ELAVL3	T2A-Venus	IDT Alt-R HDR Donor Block	+	+	1	157	143	3	5	6	11	0.454545	0.910828
						2	94	83	1	5	5	10	0.5	0.882979
						3	80	59	9	7	5	12	0.583333	0.7375
						4	118	96	4	11	7	18	0.611111	0.813559
ELAVL3-T2A-Venus-P2A-oScarlet	ELAVL3	T2A-Venus-P2A-oScarlet	IDT Alt-R HDR Donor Block	+	+	1	132	81	0	25	26	51	0.490196	0.613636
						2	121	35	0	37	49	86	0.430233	0.289256
						3	107	84	4	10	9	19	0.526316	0.785047
CRYAA-T2A-Venus	CRYAA	T2A-Venus	IDT Alt-R HDR Donor Block	+	+	1	136	118	0	8	10	18	0.444444	0.867647
						2	71	39	8	9	15	24	0.375	0.549296
						3	96	89	2	2	3	5	0.4	0.927083
						4	81	62	7	6	6	12	0.5	0.765432
ACTB2-T2A-Venus	ACTB2	T2A-Venus	IDT Alt-R HDR Donor Block	+	+	1	32	12	0	8	12	20	0.4	0.375
						2	52	33	0	10	9	19	0.526316	0.634615
					Total:	30	2997
