# Supplementary material for: Rapid and precise genome engineering in a naturally short-lived vertebrate
Source: eLife. 2023 May 16;12:e80639. doi: 10.7554/eLife.80639 (PMC10188113; doi:10.7554/eLife.80639)
Supplement: Supplementary file 5. [file elife-80639-supp5.xlsx]

## Sheet: HCRT-probes
Name	Sequence
Hcrt_SB5_0	ctcactcccaatctctataaGTCCTCCTCCCCATCGTCAGGA
Hcrt_SB5_1	CACTGCTCCCCAGTTGGCCCAGaactaccctacaaatccaat
Hcrt_SB5_2	ctcactcccaatctctataaTGTGAAGAAGCTGGTGGAGTCG
Hcrt_SB5_3	TCCCTGCTGCTTGGTTCCTGGAaactaccctacaaatccaat
Hcrt_SB5_4	ctcactcccaatctctataaGTCCCGTTTACCCAGCGTGAGG
Hcrt_SB5_5	GCTCTGCAAGCGATACTCATTCaactaccctacaaatccaat
Hcrt_SB5_6	ctcactcccaatctctataaATTGTTCCCCCCATGCTATTGC
Hcrt_SB5_7	ATCCCAGCAGCTGCATCTTCTAaactaccctacaaatccaat
Hcrt_SB5_8	ctcactcccaatctctataaAGAGGCGGCAGGAGTGAGGAGG
Hcrt_SB5_9	TGCCAGAACGGCACAGTAAGACaactaccctacaaatccaat
Hcrt_SB5_10	ctcactcccaatctctataaTTGGGCGTTACAATCCAGCTGA
Hcrt_SB5_11	CTGTCTGCAGCACTCAGACACAaactaccctacaaatccaat
Hcrt_SB5_12	ctcactcccaatctctataaACCAGGGCTTTCTTGTGCGTTG
Hcrt_SB5_13	GACAGCAGCAACATCAAAACGAaactaccctacaaatccaat
Hcrt_SB5_14	ctcactcccaatctctataaTCTTGGAGGGGCTCCACGTCAT
Hcrt_SB5_15	TGTCCATCCTAGCAGCTTTCTGaactaccctacaaatccaat

## Sheet: NPY-probes
Name	Sequence
npy_SB3_0	gtccctgcctctatatctttCGACTGTGGAAGTATGTCTCTG
npy_SB3_1	TCACCACGATGATGGGTCGTATttccactcaactttaacccg
npy_SB3_2	gtccctgcctctatatctttATCAGTGTGACCAGACTCTCTG
npy_SB3_3	CTCTCCTTCAGCAGCAGCTCTGttccactcaactttaacccg
npy_SB3_4	gtccctgcctctatatctttGTCTCGTTATCAGGTTGATGTA
npy_SB3_5	GACTGGACCTTTTCCCATACCTttccactcaactttaacccg
npy_SB3_6	gtccctgcctctatatctttGGCCAGTTCCTCGGCCGGAGCG
npy_SB3_7	GTGTCTCAGGGCTGAGTAGTACttccactcaactttaacccg
npy_SB3_8	gtccctgcctctatatctttACCGGGTACCCCTCCGTCAAGG
npy_SB3_9	TCCTCCCCGGGGTTCTCCGGTTttccactcaactttaacccg
npy_SB3_10	gtccctgcctctatatctttGCAGGAAGCCCAGCGTCCCCAG
npy_SB3_11	CTCCCAGGCAGACCAGCGCCCAttccactcaactttaacccg

## Sheet: ELAVL3-probes
Name	Sequence
ELAVL3_SB3_0	gtccctgcctctatatctttCACCCAGGCGGTAGCCGTTTAG
ELAVL3_SB3_1	TGAAGGAAACCTGCAGCACGCGttccactcaactttaacccg
ELAVL3_SB3_2	gtccctgcctctatatctttGTCGTAGTTGGTCATTGTGACG
ELAVL3_SB3_3	GCTAGCAATAGCCATGGCGGCTttccactcaactttaacccg
ELAVL3_SB3_4	gtccctgcctctatatctttGTGGTGAAGTCACGGATGACTT
ELAVL3_SB3_5	AAGCCAAAGCCCTTACATTTGTttccactcaactttaacccg
ELAVL3_SB3_6	gtccctgcctctatatctttGCCCAAAGAGCTGCCACAGGAC
ELAVL3_SB3_7	TGACATTAGTGACGGCGCCGAAttccactcaactttaacccg
ELAVL3_SB3_8	gtccctgcctctatatctttGTTGTAGACGAAGATGCACCAG
ELAVL3_SB3_9	GCTCTCATCTGCTTCGGGTGACttccactcaactttaacccg
ELAVL3_SB3_10	gtccctgcctctatatctttTTGACCCCAGCCAGGCTGGTCA
ELAVL3_SB3_11	CCAGCTCCAGTTGGACCTGAGAttccactcaactttaacccg
ELAVL3_SB3_12	gtccctgcctctatatctttATCTGAAACGCTGAGTCTGGTG
ELAVL3_SB3_13	TGCTGTCAATGGTGATGGGTGAttccactcaactttaacccg
ELAVL3_SB3_14	gtccctgcctctatatctttAGCAGCAGTTTGGTACAGCTGT
ELAVL3_SB3_15	GTGGAGGGGCCCTGTGTAGCGGttccactcaactttaacccg
ELAVL3_SB3_16	gtccctgcctctatatctttTGGCTGGGGTTGTTGGCAAACT
ELAVL3_SB3_17	GTCAGCAGGGCCTGGCCCGTCTttccactcaactttaacccg
ELAVL3_SB3_18	gtccctgcctctatatctttCCAAAGGCTTCTGTCCATTCAG
ELAVL3_SB3_19	TGACAGTGATGGGCTCAGCAGCttccactcaactttaacccg
ELAVL3_SB3_20	gtccctgcctctatatctttGTTTCGCTTGTCAAACCGGATG
ELAVL3_SB3_21	TCCTTTGATGGCCTCCTCTGCTttccactcaactttaacccg
ELAVL3_SB3_22	gtccctgcctctatatctttGTAACCTGGTCCACAAGGATGC
ELAVL3_SB3_23	AAGCCCACTCCTCGAGATATGCttccactcaactttaacccg
ELAVL3_SB3_24	gtccctgcctctatatctttGAGAGAACAGCTGCTCCATGTC
ELAVL3_SB3_25	GGGACGTGATGATGCGGCCGTAttccactcaactttaacccg
ELAVL3_SB3_26	gtccctgcctctatatctttTCCGCTCACGTAAAGGTTGGCA
ELAVL3_SB3_27	TTTCTGACTCATGGTTTTGGGGttccactcaactttaacccg
ELAVL3_SB3_28	gtccctgcctctatatctttCGAGCGTATGATACCTTGATTG
ELAVL3_SB3_29	TCACGAATGGAAGCAGAGCTTGttccactcaactttaacccg
ELAVL3_SB3_30	gtccctgcctctatatctttTGAGCGTGTTGATGGCCTTGTC
ELAVL3_SB3_31	TTTTAGTCTGTAATTTGAGGCCttccactcaactttaacccg
ELAVL3_SB3_32	gtccctgcctctatatctttTACAAAGCCGTATCCCAAACTC
ELAVL3_SB3_33	GGCATCATTTGGATCCACATAGttccactcaactttaacccg
ELAVL3_SB3_34	gtccctgcctctatatctttAGCTTGCAAGACTCAATCTCTC
ELAVL3_SB3_35	TGACCTGTTATCTTGTCTCTGAttccactcaactttaacccg

## Sheet: CRYAA-probes
Name	Sequence
CRYAA_SB5_0	ctcactcccaatctctataaCTTGTCATCACGGGTAACAGGG
CRYAA_SB5_1	CTAGGAGGATGAGGCAGCATTGaactaccctacaaatccaat
CRYAA_SB5_2	ctcactcccaatctctataaTCACTCCCTCCGCTGACCTTGG
CRYAA_SB5_3	ATGTTGCGATCACTGCGACCAGaactaccctacaaatccaat
CRYAA_SB5_4	ctcactcccaatctctataaCAGCTGACAGGGTGCAGGTAAT
CRYAA_SB5_5	GCCCGGTCAGAGTTAGCATGCCaactaccctacaaatccaat
CRYAA_SB5_6	ctcactcccaatctctataaGAGGCGGTAGCGGCGGTGAAAC
CRYAA_SB5_7	GGCTGATTGATCAACACTGGAGaactaccctacaaatccaat
CRYAA_SB5_8	ctcactcccaatctctataaTCCTGTCTTTCTCCATGCTTTC
CRYAA_SB5_9	TCACGAGCGATGTAACCATGGTaactaccctacaaatccaat
CRYAA_SB5_10	ctcactcccaatctctataaTCACCTTCACACTGAGCTCCTC
CRYAA_SB5_11	CCTGGATCTCCACATAGTCTTCaactaccctacaaatccaat
CRYAA_SB5_12	ctcactcccaatctctataaGTAGACTGTAAACTTGTCCCGG
CRYAA_SB5_13	GGGAGAAAAGTGCTTGACGTCCaactaccctacaaatccaat
CRYAA_SB5_14	ctcactcccaatctctataaGAGTTGGAGGAATCCAAAATGT
CRYAA_SB5_15	TCAGACCTCACCTGAGATATGCaactaccctacaaatccaat
CRYAA_SB5_16	ctcactcccaatctctataaAGGGGCTGATAGTAGAAGAAGC
CRYAA_SB5_17	TGCGGAACAGTGAATGTCTGTAaactaccctacaaatccaat
CRYAA_SB5_18	ctcactcccaatctctataaGATTCCCTCTCCAAAAAACTGG
CRYAA_SB5_19	ATAGGGGAAAAGGTCGTAGTCAaactaccctacaaatccaat
CRYAA_SB5_20	ctcactcccaatctctataaGAGCCCAGGGCACGTCTGAACC
CRYAA_SB5_21	TCAAAGAGGCGGGCGGGATAGAaactaccctacaaatccaat

## Sheet: Venus-probes
Name	Sequence
Venus_SB1_0	gaggagggcagcaaacggaaGAGAGTGATCCCGGCGGCGGTC
Venus_SB1_1	TTACTTGTACAGCTCGTCCATGtagaagagtcttcctttacg
Venus_SB1_2	gaggagggcagcaaacggaaTCGCGCTTCTCGTTGGGGTCTT
Venus_SB1_3	ACGAACTCCAGCAGGACCATGTtagaagagtcttcctttacg
Venus_SB1_4	gaggagggcagcaaacggaaGGTAGTGGTTGTCGGGCAGCAG
Venus_SB1_5	TGCTCAGGGCGGACTGGTAGCTtagaagagtcttcctttacg
Venus_SB1_6	gaggagggcagcaaacggaaGTTCTGCTGGTAGTGGTCGGCG
Venus_SB1_7	CACGGGGCCGTCGCCGATGGGGtagaagagtcttcctttacg
Venus_SB1_8	gaggagggcagcaaacggaaTTGTGGCGGATCTTGAAGTTGG
Venus_SB1_9	AGCTGCACGCCGCCGTCCTCGAtagaagagtcttcctttacg
Venus_SB1_10	gaggagggcagcaaacggaaCGGCGGTGATATAGACGTTGTG
Venus_SB1_11	CCTTGATGCCGTTCTTCTGCTTtagaagagtcttcctttacg
Venus_SB1_12	gaggagggcagcaaacggaaGTGCCCCAGGATGTTGCCGTCC
Venus_SB1_13	GCTGTTGTAGTTGTACTCCAGCtagaagagtcttcctttacg
Venus_SB1_14	gaggagggcagcaaacggaaTCGATGCGGTTCACCAGGGTGT
Venus_SB1_15	TCCTTGAAGTCGATGCCCTTCAtagaagagtcttcctttacg
Venus_SB1_16	gaggagggcagcaaacggaaGGGTCTTGTAGTTGCCGTCGTC
Venus_SB1_17	CGCCCTCGAACTTCACCTCGGCtagaagagtcttcctttacg
Venus_SB1_18	gaggagggcagcaaacggaaGACGTAGCCTTCGGGCATGGCG
Venus_SB1_19	CTTGAAGAAGATGGTGCGCTCCtagaagagtcttcctttacg
Venus_SB1_20	gaggagggcagcaaacggaaATGTGGTCGGGGTAGCGGGCGA
Venus_SB1_21	GACTTGAAGAAGTCGTGCTGCTtagaagagtcttcctttacg
Venus_SB1_22	gaggagggcagcaaacggaaTGGTCACGAGGGTGGGCCAGGG
Venus_SB1_23	AGCACTGCAGGCCGTAGCCCAGtagaagagtcttcctttacg
Venus_SB1_24	gaggagggcagcaaacggaaGATCAGCTTCAGGGTCAGCTTG
Venus_SB1_25	CACGGGCAGCTTGCCGGTGGTGtagaagagtcttcctttacg
Venus_SB1_26	gaggagggcagcaaacggaaTCGCCGGACACGCTGAACTTGT
Venus_SB1_27	CCGTAGGTGGCATCGCCCTCGCtagaagagtcttcctttacg
Venus_SB1_28	gaggagggcagcaaacggaaCGACCAGGATGGGCACCACCCC
Venus_SB1_29	GGCCGTTTACGTCGCCGTCCAGtagaagagtcttcctttacg
