# Supplementary figures and images for: Rapid and precise genome engineering in a naturally short-lived vertebrate
Source: eLife journal article supplement (doi:10.7554/elife.80639), 2023-04-17

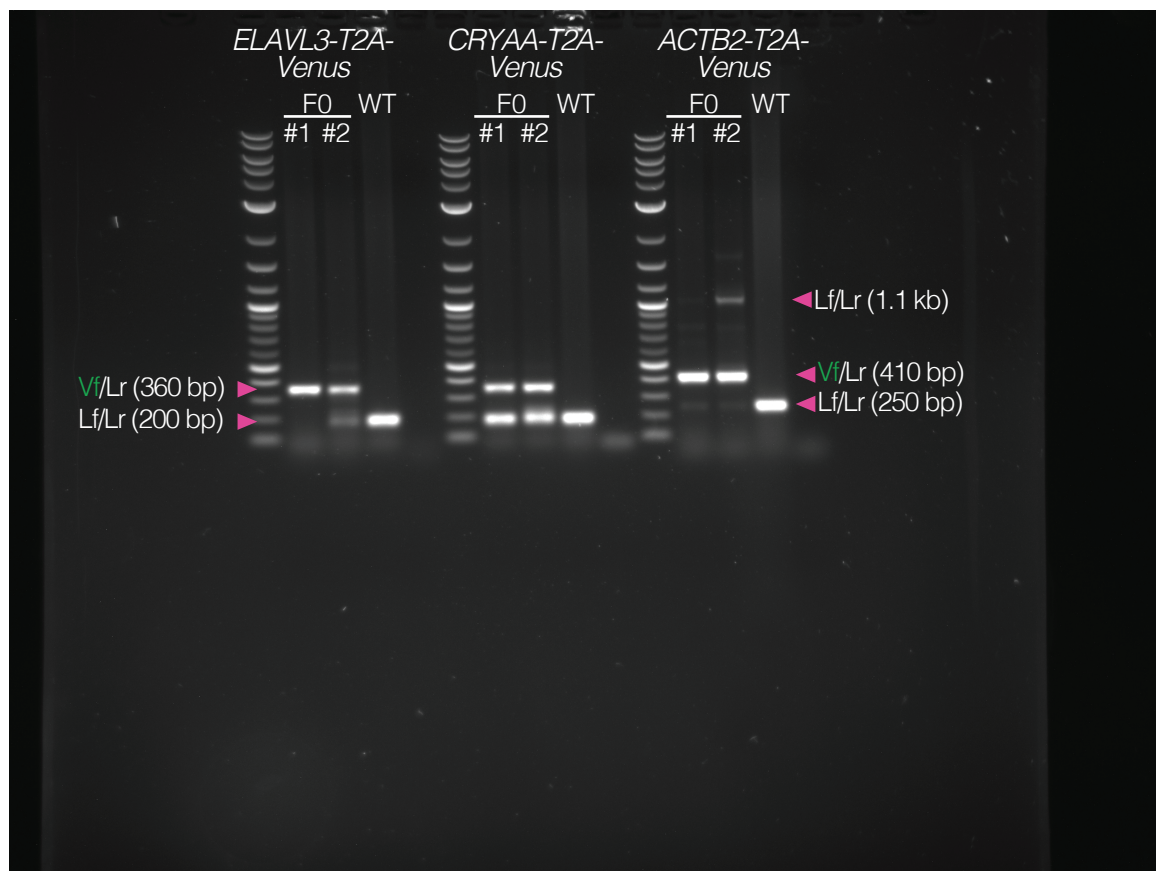

Supplement: fig1-data2 [file Figure1-Source Data2.pdf › Figure1-Source Data2.pdf]

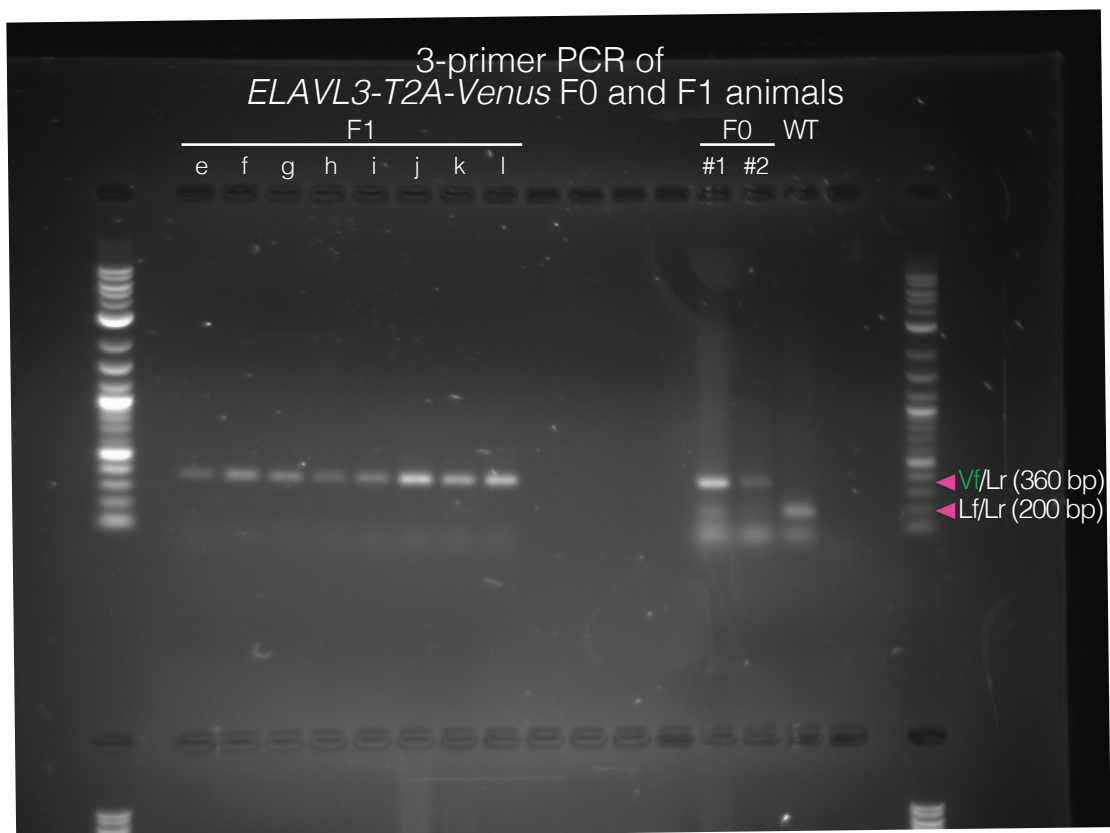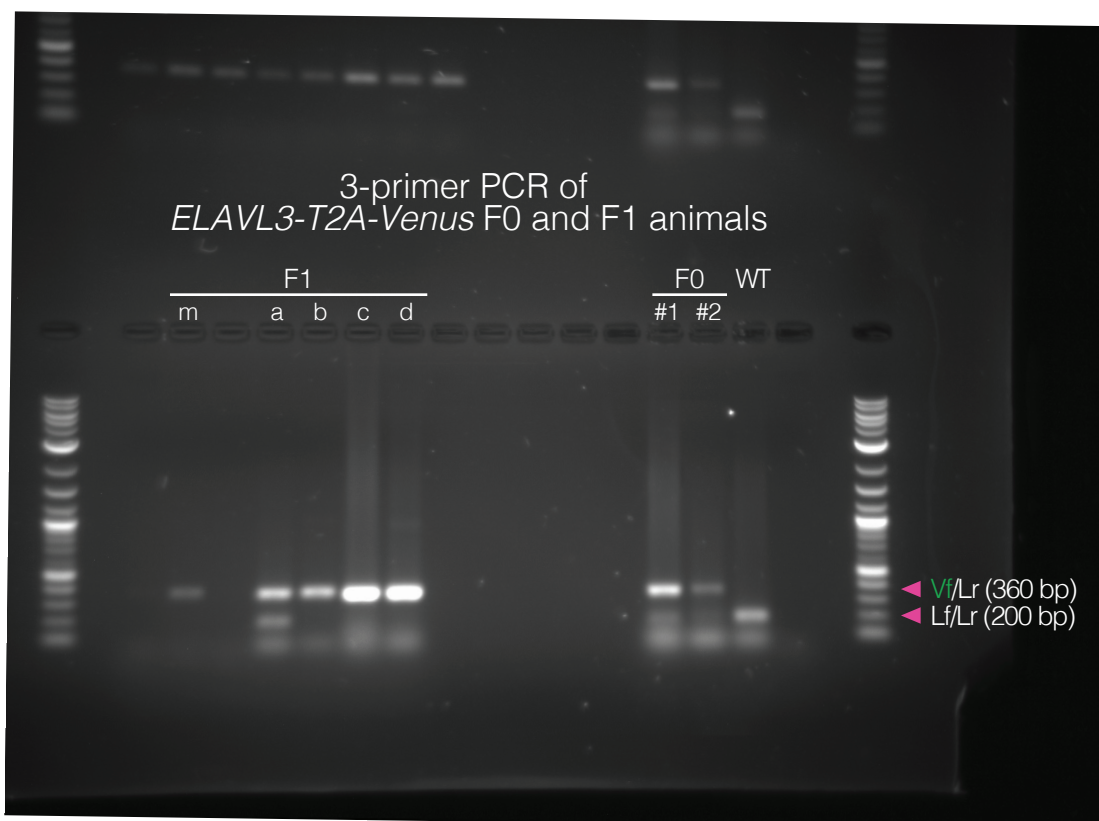

Supplement: fig2-figsupp1-data2 [file Figure2-figure supplement 1-Source Data2.pdf › Figure2-figure supplement 1-Source Data2.pdf]

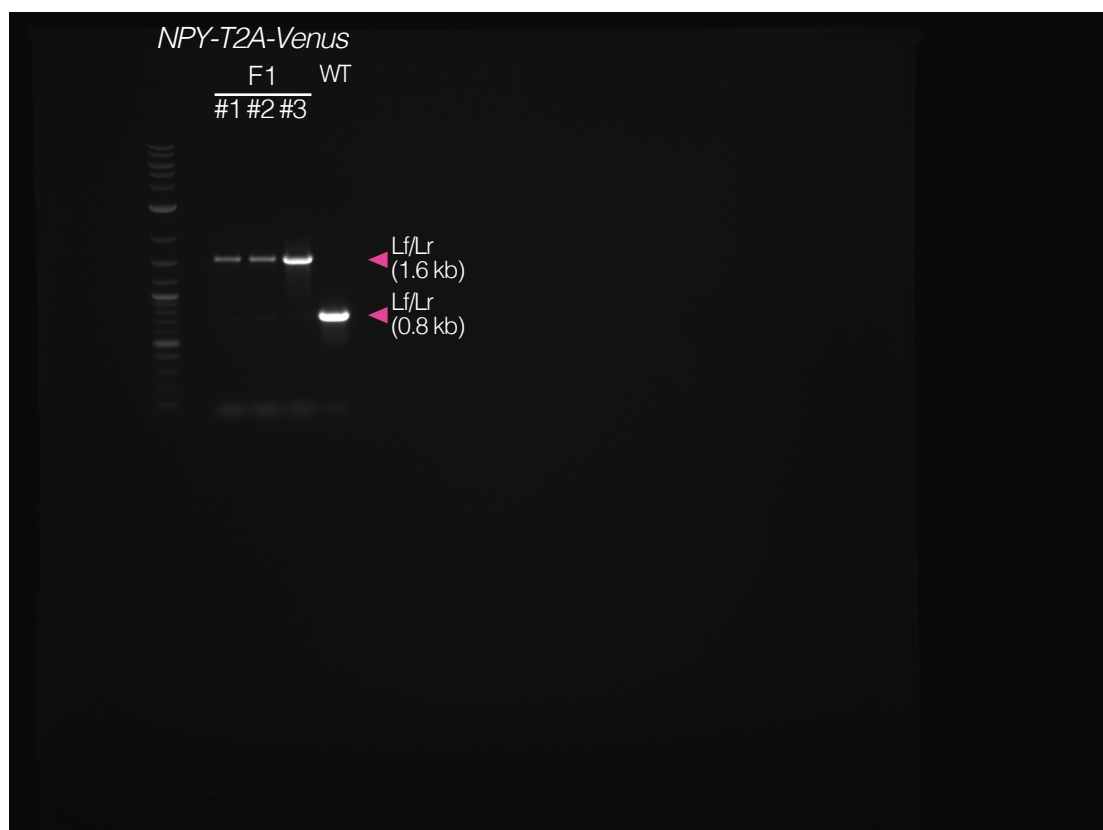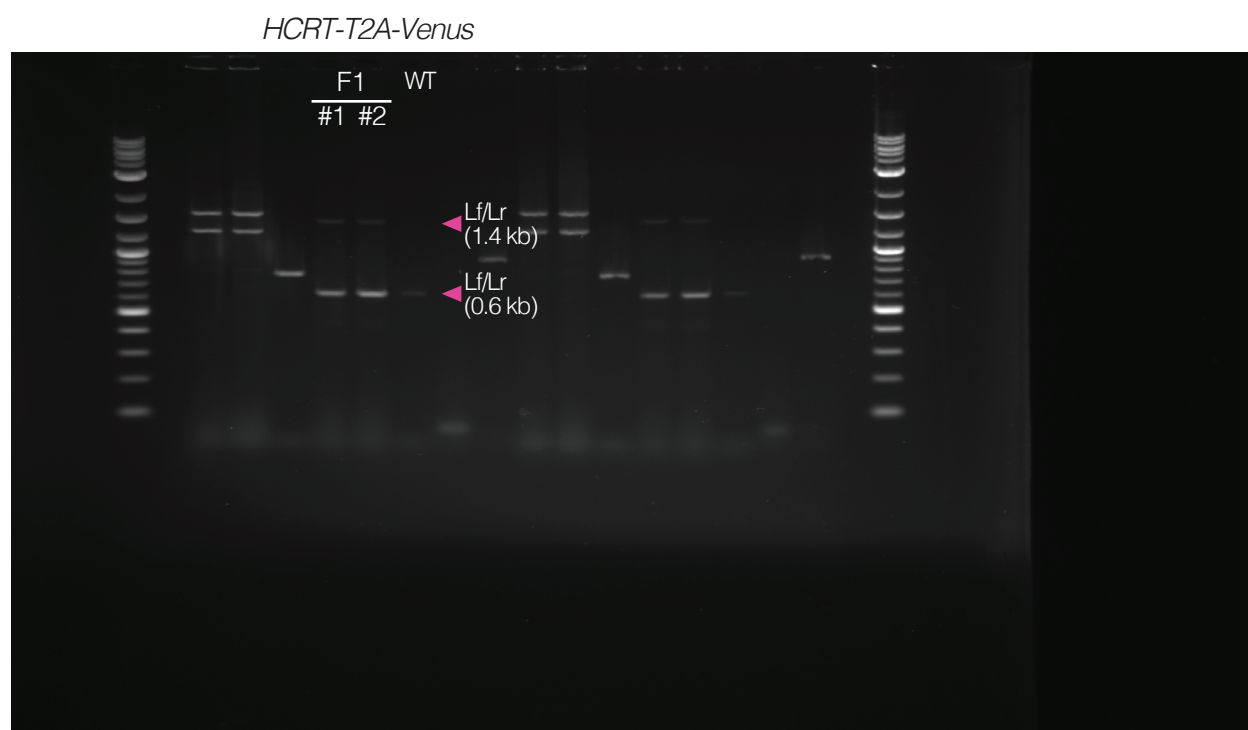

Supplement: fig4-data3 [file Figure4-Source Data3.pdf › Figure4-Source Data3.pdf]
